# Supplementary material
Source: publisher figshare collection journal article supplement (https://acs.figshare.com/ndownloader/files/3824170)
Supplement: Supplementary file 1 [file 3824170]

# Electronic Structures and Transport Properties of n-Type-Doped Indium Oxides

Zhangxian Chen,<sup>†</sup> Liang Huang,<sup>†,‡</sup> Qingfan Zhang,<sup>‡</sup> Yongjie Xi,<sup>†</sup> Ran Li,<sup>†</sup> Wanchao Li,<sup>†</sup>  
Guoqin Xu,<sup>\*,†</sup> and Hansong Cheng<sup>\*,†,‡</sup>

<sup>†</sup>Department of Chemistry, National University of Singapore, 3 Science Drive 3,  
Singapore 117543

<sup>‡</sup>Sustainable Energy Laboratory, China University of Geosciences Wuhan, 388 Lumo  
Road, Wuhan, China 430074

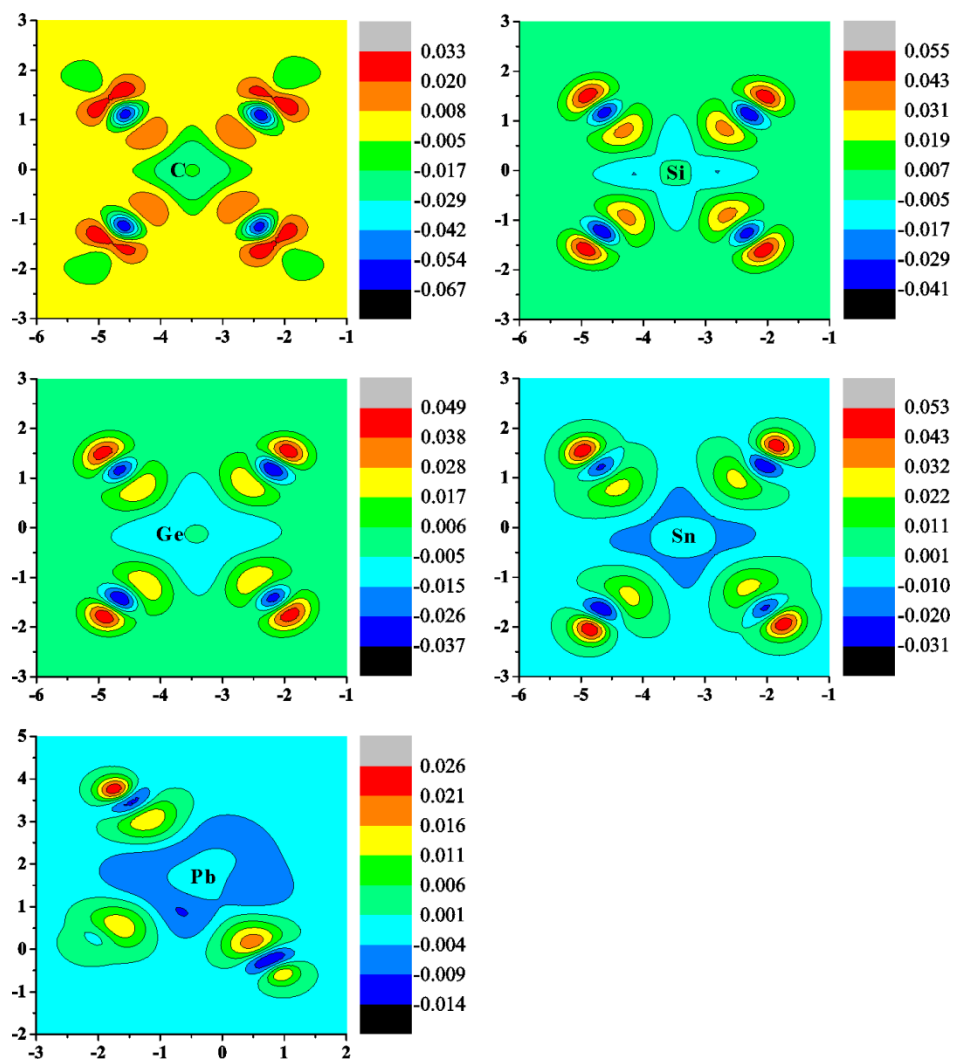

Figure S1. Charge density differences of  $\text{In}_2\text{O}_3$  doped by group 14 elements. The charge difference is defined as  $\Delta\rho = \rho_{\text{total}} - \rho_{\text{dopant}} - \rho_{\text{In}_2\text{O}_3}$ . Here  $\rho_{\text{total}}$ ,  $\rho_{\text{dopant}}$  and  $\rho_{\text{In}_2\text{O}_3}$  refer to the charge density of doped system, single dopant atom and the rest  $\text{In}_2\text{O}_3$ , respectively.

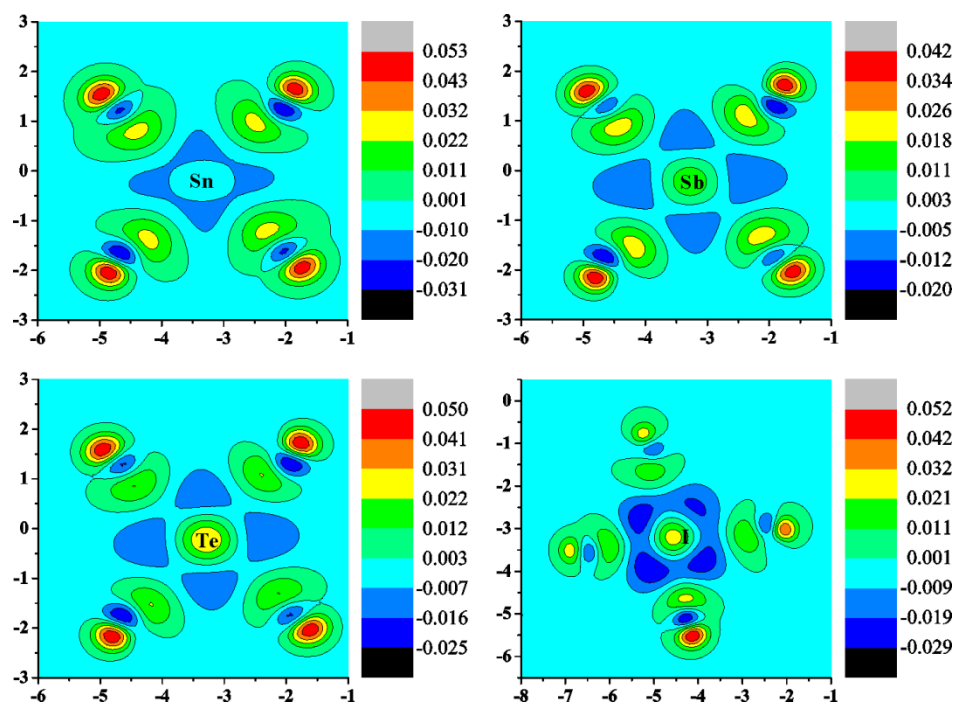

Figure S2. Charge density differences of  $\text{In}_2\text{O}_3$  doped by Sn, Sb, Te and I.
